# Supplementary material for: Actin cytoskeletal inhibitor 19,20-epoxycytochalasin Q sensitizes yeast cells lacking ERG6 through actin-targeting and secondarily through disruption of lipid homeostasis
Source: PubMed Central journal article supplement (PMC8032726; doi:10.1038/s41598-021-87342-4), 2021-04-08
Supplement: 41598_2021_87342_MOESM1_ESM.pdf [file 41598_2021_87342_MOESM1_ESM.pdf]

**Actin cytoskeletal inhibitor 19,20-epoxycytochalasin Q modulates disruption of lipid sterol homeostasis in *S. cerevisiae***

Kwanrutai Watchaputi<sup>1</sup>, Pichayada Somboon<sup>2</sup>, Nipatthra Phromma-in<sup>1</sup>, Khanok Ratanakhanokchai<sup>1</sup> and

Nitnipa Soontorngun<sup>1,\*</sup>

(a)

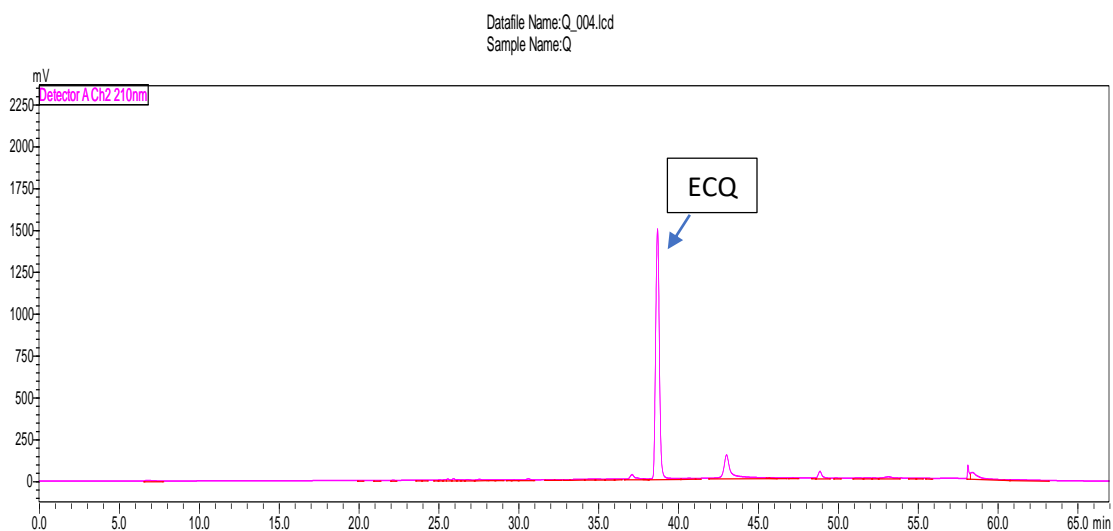

(b)

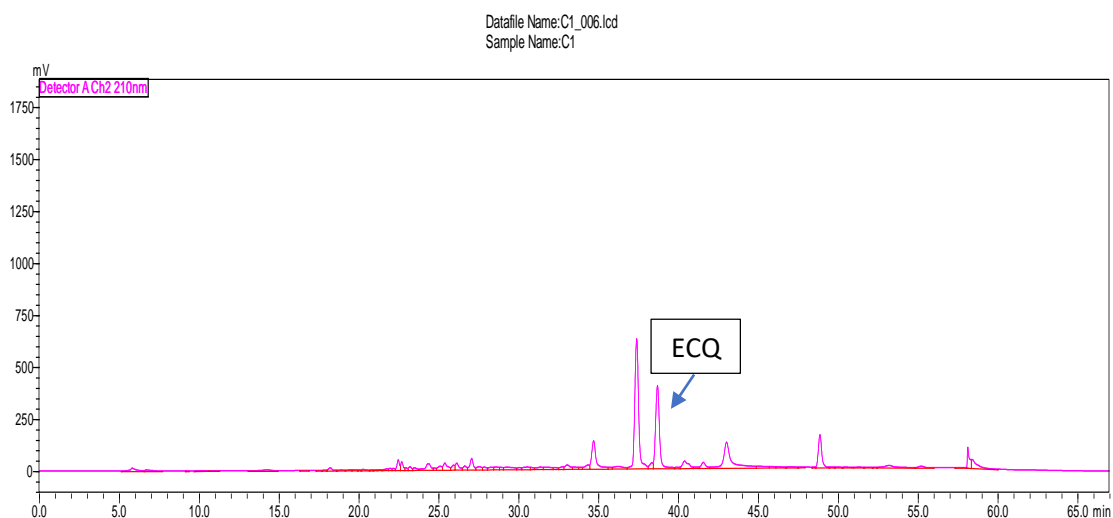

Supplementary Figure 1. HPLC profile of (a) ECQ and (b) the *Xylaria* extract containing ECQ of 27.24%±2.9% in a total extract at retention time at 38.7.
